# Supplementary material for: A novel placental like alkaline phosphate promoter driven transcriptional silencing combined with single chain variable fragment antibody based virosomal delivery for neoplastic cell targeting
Source: PubMed Central journal article supplement (PMC4524171; doi:10.1186/s12967-015-0602-1), 2015-08-05
Supplement: 12967_2015_602_MOESM2_ESM.pdf [file 12967_2015_602_MOESM2_ESM.pdf]

## Supplementary Figure 2A

### A) PLAP Promoter +24

AAGCTGCCTTTCTCAGGACCCCAGCCCCAGCCCAGCCCAGCCACACCCTGCGACT  
 CTCTTCAGCCAGTGTGGCTTCAGGTCAAGAGGCTGGGCGGGGTCAAGGTGGTAA  
 CAAGGGGAGGGGCCAGGACACAGTTTTCCCTGATTTAAACCCAGGCAGCCTGGA  
 GTGCAGCTCATACTCCATACCTGGGATTTCCGC

**Table S1. Sequence of the primers and oligos used in the study**

| <b>Primer ID</b>                    | <b>Sequence(5'-3')</b>                                              |
|-------------------------------------|---------------------------------------------------------------------|
| <b>PLAP Promoter</b> Outer forward  | AGGCCAGATGTTGGAGCA                                                  |
| <b>PLAP Promoter</b> Outer reverse  | GCGGAAATCCCAGGTATGGAGT                                              |
| <b>PLAP Promoter</b> Inner forward  | CCAGCCCAGCCCAGCCACAC                                                |
| <b>PLAP Promoter</b> Inner reverse  | GCGGAAATCCCAGGTATGGAGT                                              |
| <b>NFκB DNA binding sequences</b>   | GGGAATTTCCGGGAATTTCCGGGAATTTCCGGGA<br>ATTTCC                        |
| <b>E6/E7oligos-sense strand</b>     | 5'-GATCCTGCGCCAACGCCTTACATA TTCAAGAGA<br>GGTATGTAAGGCGTTGGCGCAA-3'  |
| <b>E6/E7oligos-antisense strand</b> | 5'-AGCTTTGCGCCAACGCCTTACATACC<br>TCTCTTGAA TATGTAAGGCGTTGGCGCA G-3' |
| <b>18S Forward</b>                  | GTAACCCGTTGAACCCATT                                                 |
| <b>18S Reverse</b>                  | CCATCCAATCGGTAGTAGCG                                                |
| <b>Actin Forward</b>                | TCATGAAGTGTGACGTTGACATCCGT                                          |
| <b>Actin Reverse</b>                | CCTAGAAGCATTGCGGTGCACGATG                                           |
| <b>POLR2A Forward</b>               | CATCAAGAGAGTCCAGTTCGG                                               |
| <b>POLR2A Reverse</b>               | CCCTCAGTCGTCTCTGGGTA                                                |
| <b>PPIA Forward</b>                 | CACCGTGTCTTCGACATTG                                                 |
| <b>PPIA Reverse</b>                 | TTCTGCTGTCTTTGGGACCT                                                |
| <b>B2M Forward</b>                  | TAGCTGTGCTCGCGCTACT                                                 |
| <b>B2M Reverse</b>                  | TCTCTGCTGGATGACGTGAG                                                |
| <b>Tubulin Forward</b>              | TAACCATGAGGGAAATCGTG                                                |
| <b>Tubulin Reverse</b>              | TCGATGCCATGTTCACTACT                                                |

|                          |                             |
|--------------------------|-----------------------------|
| <b>GAPDH Forward</b>     | CCAAGGTCATCCATGACAACCTTTGGT |
| <b>GAPDH Reverse</b>     | TGTTGAAGTCAGAGGAGACCACCTG   |
| <b>HPV-16 E6 Forward</b> | AGCGACCCAGAAAGTTACCA        |
| <b>HPV-16 E6 Reverse</b> | GCATAAATCCCGAAAAGCAA        |
| <b>HPV-16 E7 Forward</b> | ACAAGCAGAACCGGACAGAG        |
| <b>HPV-16 E7 Reverse</b> | GCCCATTAACAGGTCTTCCA        |
| <b>NOXA Forward</b>      | GAGATGCCTGGGAAGAAGG         |
| <b>NOXA Reverse</b>      | TTTCTGCCGGAAGTTCAGTT        |
| <b>PUMA Forward</b>      | GACCTCAACGCACAGTACGA        |
| <b>PUMA Reverse</b>      | CACCTAATTGGGCTCCATCT        |
| <b>CyclinA2Forward</b>   | ACCTGGACCCAGAAAACCAT        |
| <b>CyclinA2Reverse</b>   | CACTCACTGGCTTTTCATCTTC      |
| <b>Cyclin E Forward</b>  | AGA AAT GGC CAA AAT CGACA   |
| <b>Cyclin E Reverse</b>  | CCCGGTCATCATCTTCTTTG        |
| <b>OAS1 Forward</b>      | TTCTCCACCTGCTTCACAGA        |
| <b>OAS1 Reverse</b>      | GAGCTCCAGGGCATACTGAG        |
| <b>HPV-18 E6 Forward</b> | CATGCTGCATGCCATAAATG        |
| <b>HPV-18 E6 Reverse</b> | TGTGTTTCTCTGCGTCGTTG        |
| <b>HPV-18 E7 Forward</b> | ACCTAAGGCAACATTGCAAG        |
| <b>HPV-18 E7 Reverse</b> | ACAAAGGACAGGGTGTTTCAG       |

#### **Primers used for Bisulphite sequencing**

|                                              |                                                      |
|----------------------------------------------|------------------------------------------------------|
| <b>Bisulphite Outer Forward</b>              | TAGTTTTATGTTAGTAATTATGGTT                            |
| <b>Bisulphite Outer Reverse</b>              | ACAACCTCTATACATAACTATAATA                            |
| <b>Bisulphite Inner Forward (M13 tagged)</b> | AGCGGATAACAATTTACACAGGATGTTTTTTTGATT<br>TGTATTGTTTG  |
| <b>Bisulphite Inner Reverse (M13 tagged)</b> | CGCCAGGGTTTTCCAGTCACGACCCTTAAAAATTTA<br>AACCTTATAACC |

**Primers used for ChIP**

|                           |                           |
|---------------------------|---------------------------|
| <b>Chr16ChIP Forward</b>  | GTCTCTTTCTTGTTTTTAAGCTGGG |
| <b>Chr16ChIP Reverse</b>  | TGAGCTCATTGAGACATTTGG     |
| <b>HPV-16 LCR Forward</b> | CCAAATCCCTGTTTTCTGA       |
| <b>HPV-16 LCR Reverse</b> | CGTTGGCGCATAGTGATTTA      |

**Supplementary Figure S2A:** (A) Sequence of the PLAP promoter used in the study. (B) List of Primers used.
