# Supplementary material for: A novel placental like alkaline phosphate promoter driven transcriptional silencing combined with single chain variable fragment antibody based virosomal delivery for neoplastic cell targeting
Source: PubMed Central journal article supplement (PMC4524171; doi:10.1186/s12967-015-0602-1), 2015-08-05
Supplement: 12967_2015_602_MOESM3_ESM.pdf [file 12967_2015_602_MOESM3_ESM.pdf]

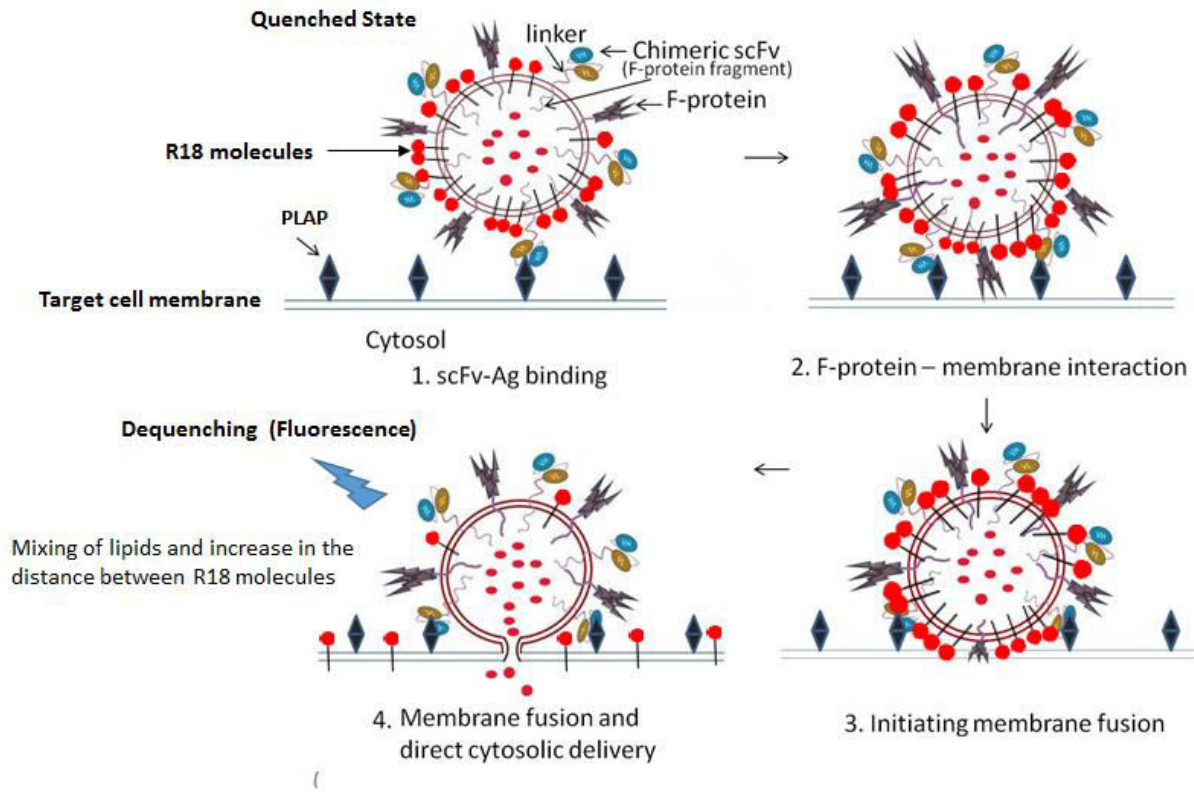

**Additional File 3: The extent of chimeric scFv-virosome fusion assessed by Fluorescence Dequenching.** The fluorophore octadecyl rhodamine beta chloride (R18) which has intrinsic quenching properties at close proximity (high concentration) was incorporated in the membrane of the virosome. When fusion with the cell occurs, the membrane fuse and mixing of target cell membrane's and virosomal lipids takes place. This increases the distance between R18 molecules and leads to the dequenching and the fluorescence (490 excitation and 520 nm emission) is recorded with a spectrofluorimeter.
