# Supplementary material for: A novel placental like alkaline phosphate promoter driven transcriptional silencing combined with single chain variable fragment antibody based virosomal delivery for neoplastic cell targeting
Source: PubMed Central journal article supplement (PMC4524171; doi:10.1186/s12967-015-0602-1), 2015-08-05
Supplement: 12967_2015_602_MOESM6_ESM.pdf [file 12967_2015_602_MOESM6_ESM.pdf]

A)

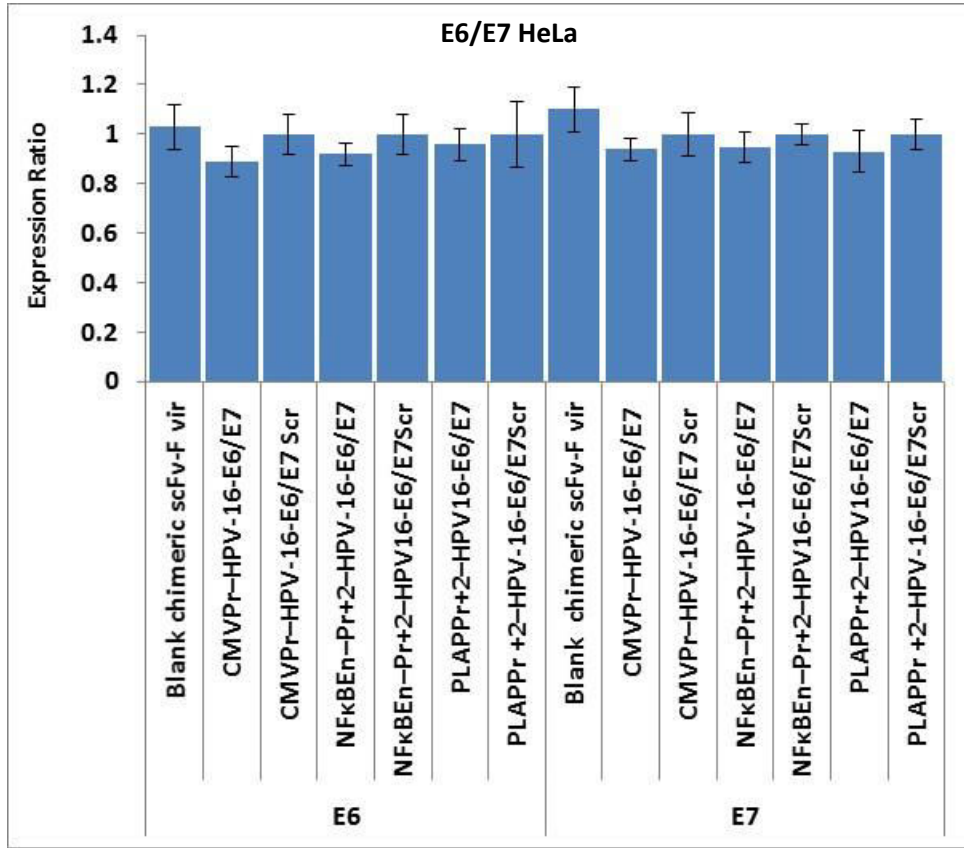

B)

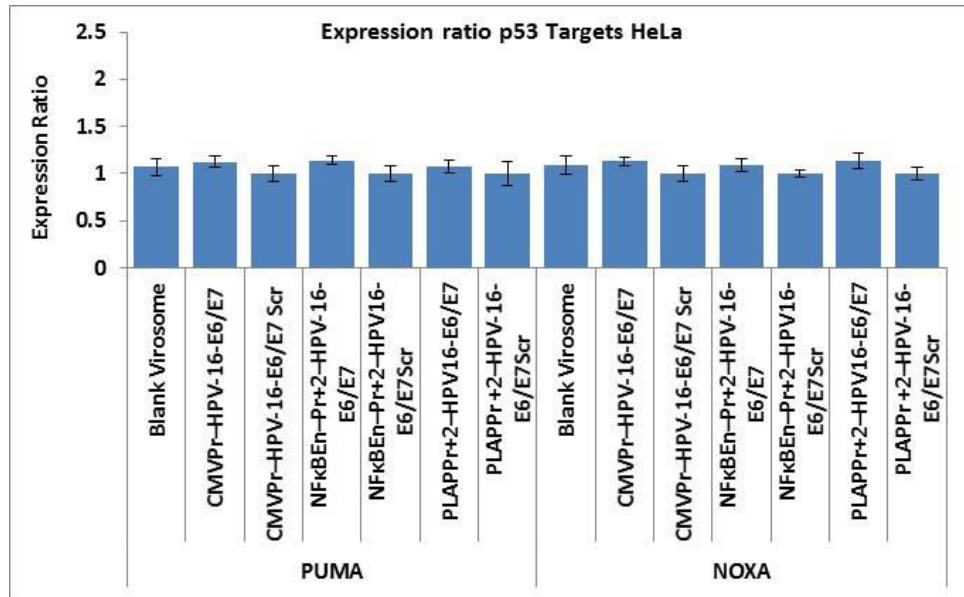

c)

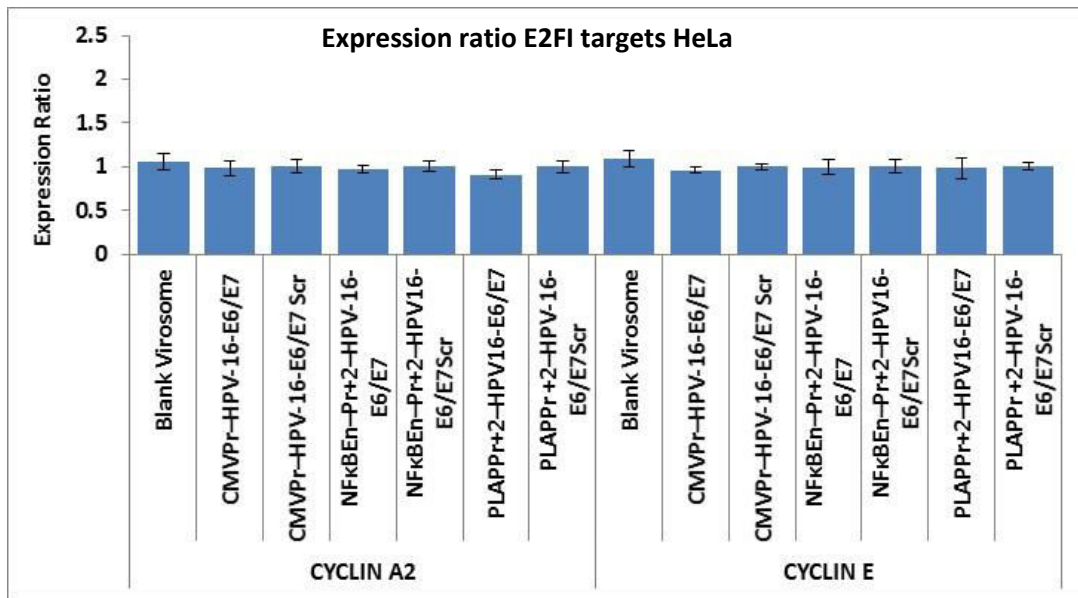

**Supplementary Figure S6A: Knockdown effects in HeLa post Immuno-virosomal delivery.** Various shRNA constructs (NFκBEn-Pr+2-HPV-16-E6/E7, PLAPP+2-HPV-16-E6/E7 and CMVPr-HPV-16-E6/E7) and their controls were packaged and delivered by chimeric virosomes to HeLa. (A) There was no significant decrease in E6 and E7 oncogene expression with any shRNA expression construct. (B) PUMA and NOXA -p53 target genes were not restored in HeLa. (C) E2F1 candidate genes were not affected post virosomal delivery of shRNA constructs in HeLa, demonstrating specificity of shRNA for HPV-16 LCR
